# Supplementary material for: The hyper-enrichment of silver through the aggregation of silver sulfide nanoparticles
Source: PubMed Central journal article supplement — Nat Commun. 2024 Nov 26;15:10245. doi: 10.1038/s41467-024-54726-9 (PMC11599567; doi:10.1038/s41467-024-54726-9), 2024-11-26
Supplement: 41467_2024_54726_MOESM1_ESM.pdf [file 41467_2024_54726_MOESM1_ESM.pdf]

# The hyper-enrichment of silver through the aggregation of silver sulfide nanoparticles

Mingchun Chai<sup>1\*</sup>, Anthony E. Williams-Jones<sup>2</sup>, Wei Fu<sup>1</sup>, Jianwei Li<sup>3,4\*</sup> & Cheng Xu<sup>1,5,6</sup>

<sup>1</sup>College of Earth Sciences, Guilin University of Technology, Guilin 541004, China.

<sup>2</sup>Department of Earth and Planetary Sciences, McGill University, Montreal, Québec H3A 0E8, Canada.

<sup>3</sup>State Key Laboratory of Geological Processes and Mineral Resources, China University of Geosciences, Wuhan 430074, China.

<sup>4</sup>School of Earth Resources, China University of Geosciences, Wuhan 430074, China.

<sup>5</sup>Key Laboratory of Orogenic Belts and Crustal Evolution, School of Earth and Space Sciences, Peking University, Beijing 100871, China.

<sup>6</sup>Collaborative Innovation Center for Exploration of Nonferrous Metal Deposits and Efficient Utilization of Resources by the Province and Ministry, Guilin University of Technology, Guilin 541004, China.

Correspondence to: Mingchun Chai ([mcchai@cug.edu.cn](mailto:mcchai@cug.edu.cn)) and  
Jianwei Li ([jwli@cug.edu.cn](mailto:jwli@cug.edu.cn))

This file contains three Supplementary Figures:

- Supplementary Fig. 1
- Supplementary Fig. 2
- Supplementary Fig. 3

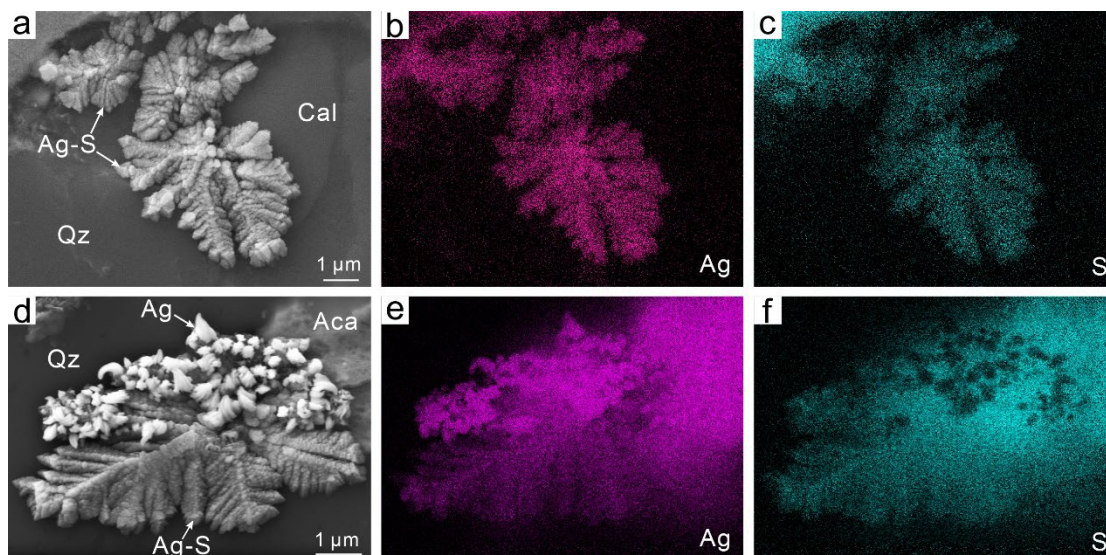

**Supplementary Fig. 1. Scanning electron microscopic images and elemental maps of silver sulfide dendrites and native silver. a–c** Well-organized silver sulfide dendrites and their compositions. **d–f** The morphology and composition of native silver decorating silver sulfide dendrites. Aca, acanthite; Ag, native silver; Ag-S, silver sulfide dendrite; Cal, calcite; Qz, quartz.

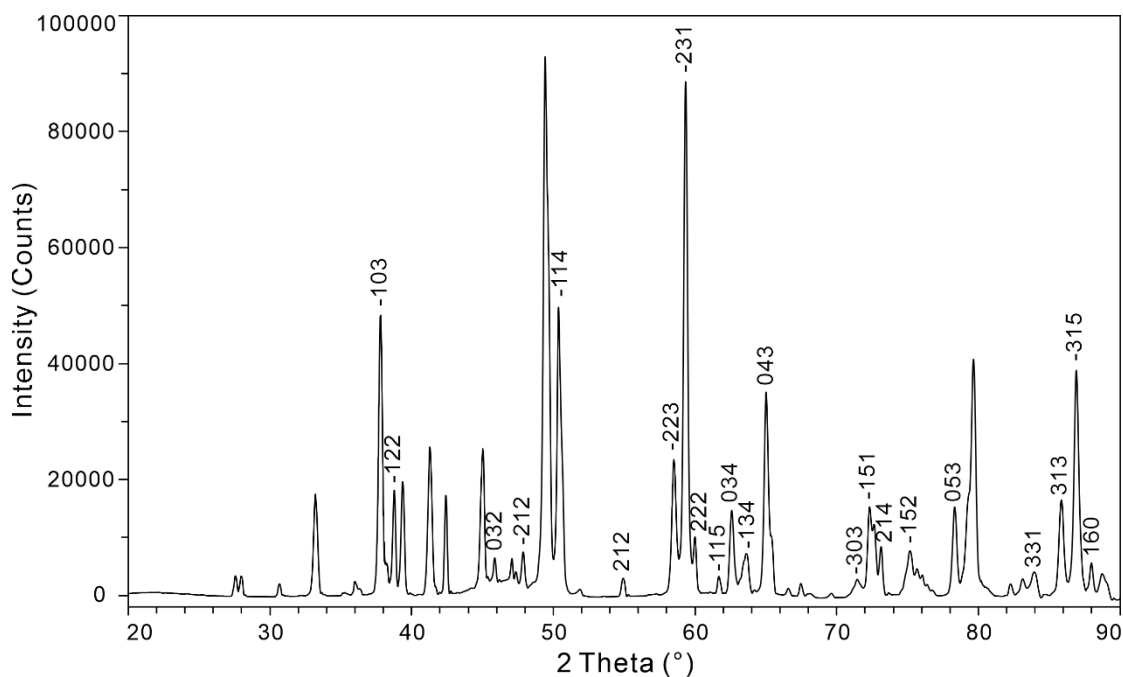

**Supplementary Fig. 2. A micro X-ray diffraction spectrum collected in situ for some of the silver sulfide crystals.** The spectrum identifies the silver sulfide as the  $\alpha$ -phase acanthite. The source data are provided as a Source Data file.

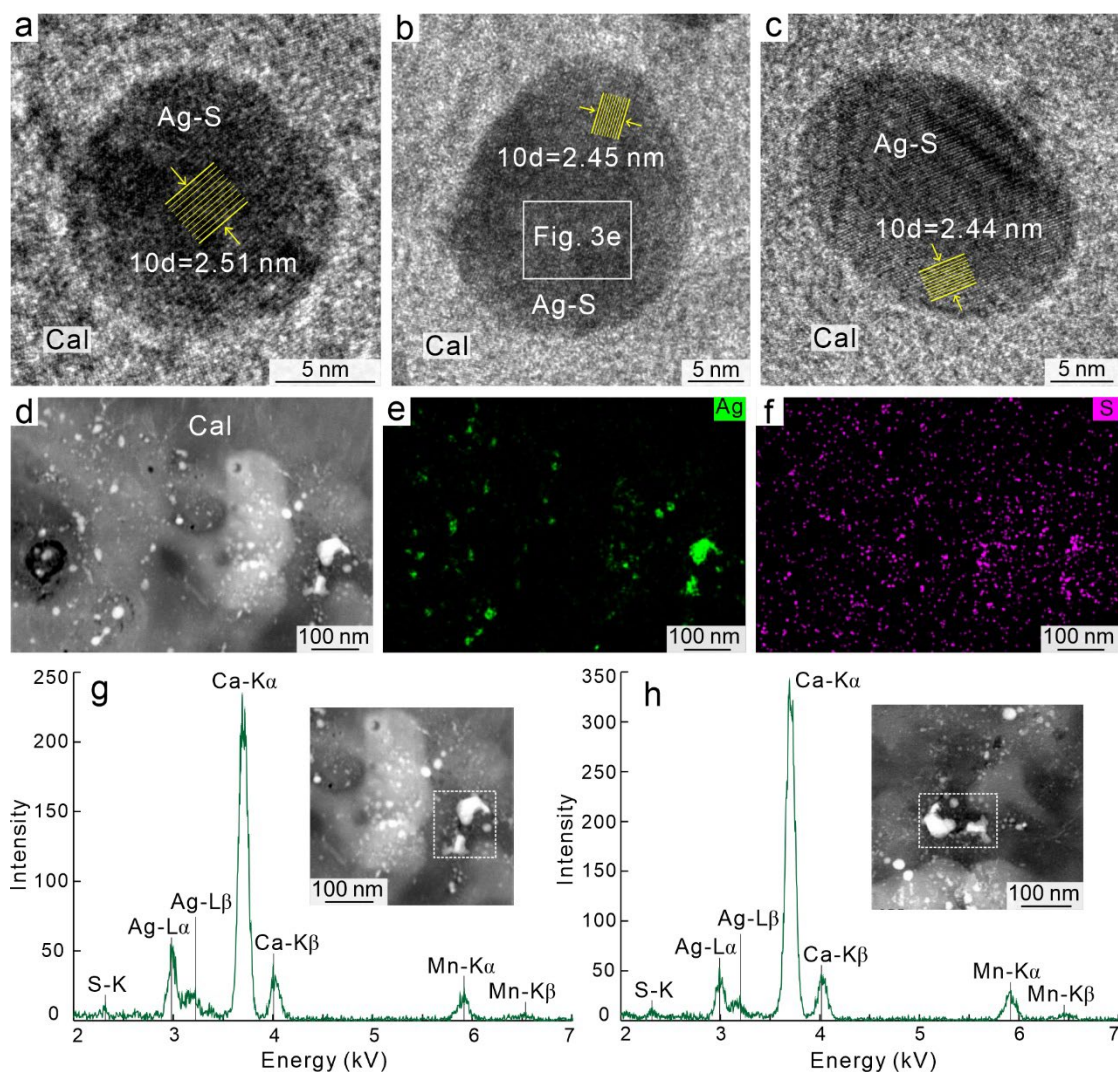

**Supplementary Fig. 3. Transmission electron microscopic images illustrating silver sulfide nanoparticles, their crystal lattice fringes, compositions and energy-dispersive spectra. a–c** Individual silver sulfide nanoparticles with d-spacings of 0.251 nm, 0.245 nm and 0.244 nm consistent with that of acanthite; **b** illustrates the nanoparticle corresponding to the electron diffraction pattern shown in Fig 3e. **d–f** A high-angle annular dark-field scanning transmission electron micrograph (**d**) and corresponding elemental maps (**e** and **f**). **g, h** Energy-dispersive spectra showing the composition of silver sulfide nanoparticles in calcite. Ag-S, silver sulfide nanoparticle; Cal, calcite. The source data are provided as a Source Data file.
